# Supplementary material for: A Sensitive LC-MS/MS Method for Palytoxin Using Lithium Cationization
Source: PubMed Central journal article supplement (PMC6316396; doi:10.3390/toxins10120537), 2018-12-14
Supplement: toxins-10-00537-s001.pdf [file toxins-10-00537-s001.pdf]

# Supplementary Materials: A Sensitive LC-MS/MS Method for Palytoxin Using Lithium Cationization

Mirjam D. Klijnstra and Arjen Gerssen

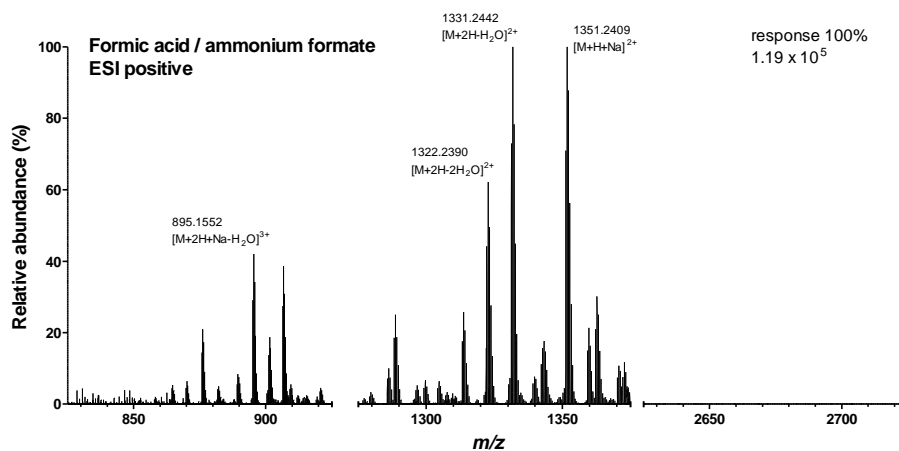

**Figure S1.** Spectrum palytoxin (PITX), electrospray ionisation (ESI) positive, mobile phase: Acetonitrile, H<sub>2</sub>O, formic acid, ammonium formate.

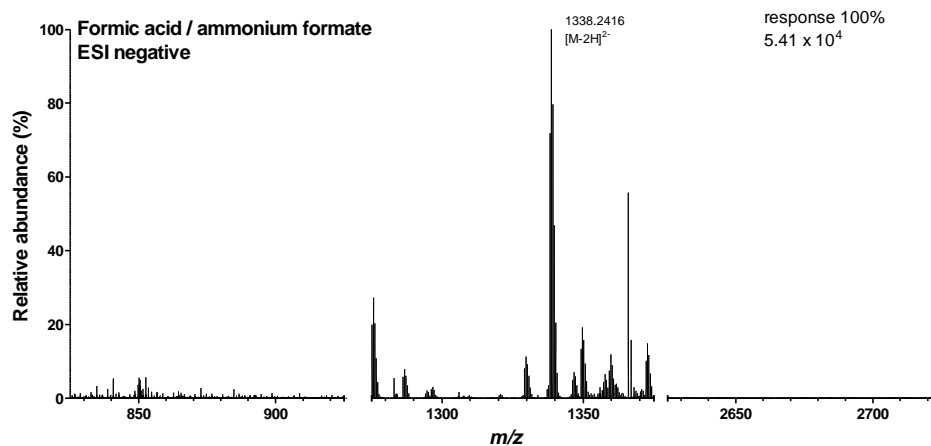

**Figure S2.** Spectrum PITX, ESI negative, mobile phase: Acetonitrile, H<sub>2</sub>O, formic acid, ammonium formate.

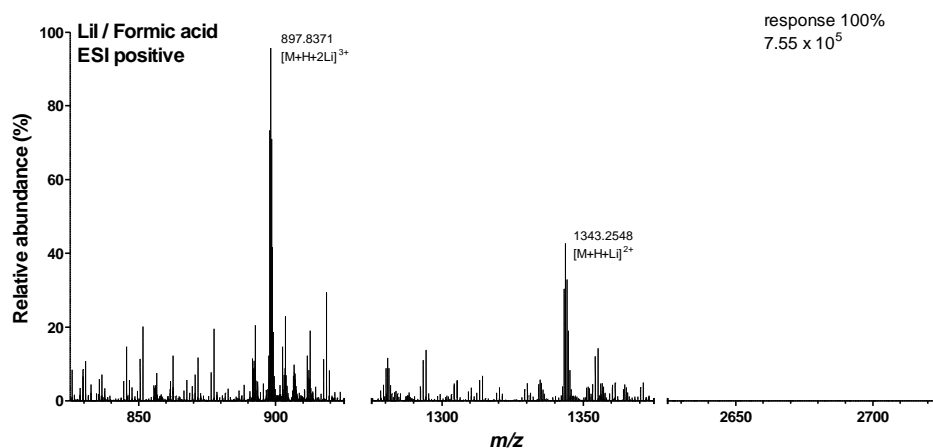

Figure S3. Spectrum PITX, ESI positive, mobile phase: Acetonitrile, H<sub>2</sub>O, LiI, formic acid.

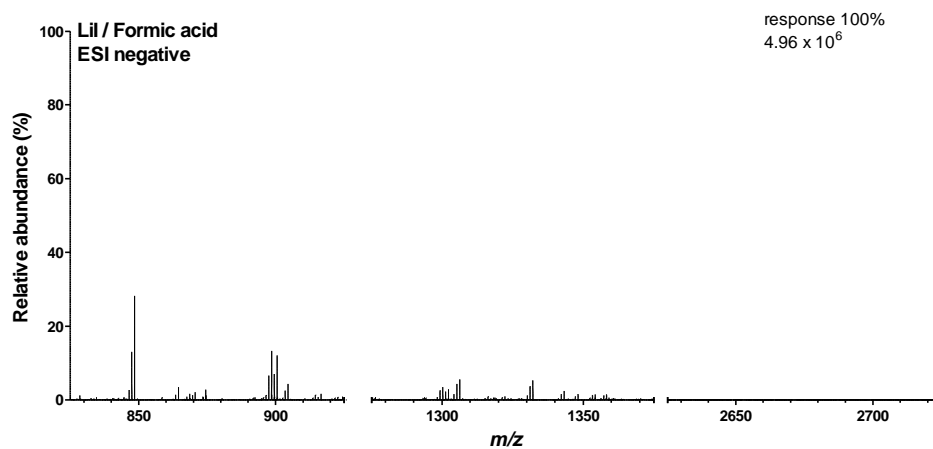

Figure S4. Spectrum PITX, ESI negative, mobile phase: Acetonitrile, H<sub>2</sub>O, LiI, formic acid.

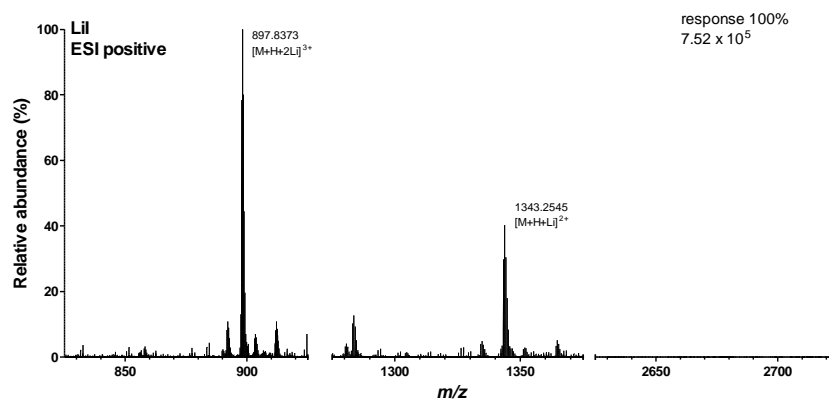

Figure S5. Spectrum PITX, ESI positive, mobile phase: Acetonitrile, H<sub>2</sub>O, LiI.

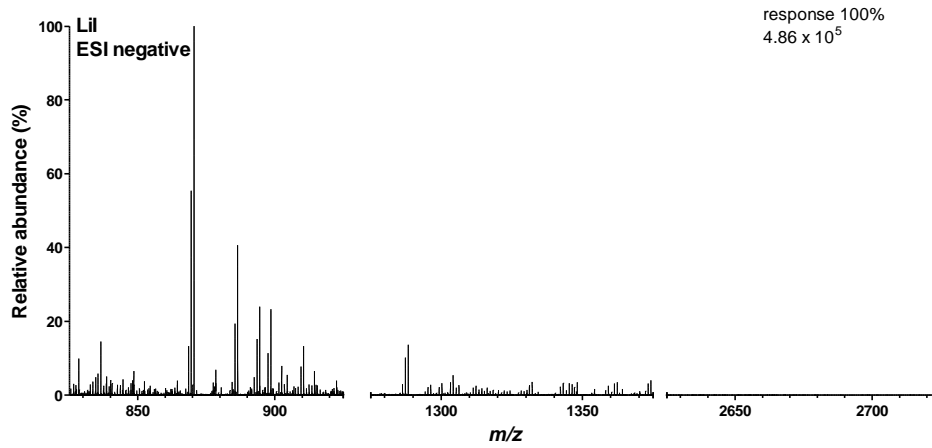

Figure S6. Spectrum PITX, ESI negative, mobile phase: Acetonitrile, H<sub>2</sub>O, LiI.

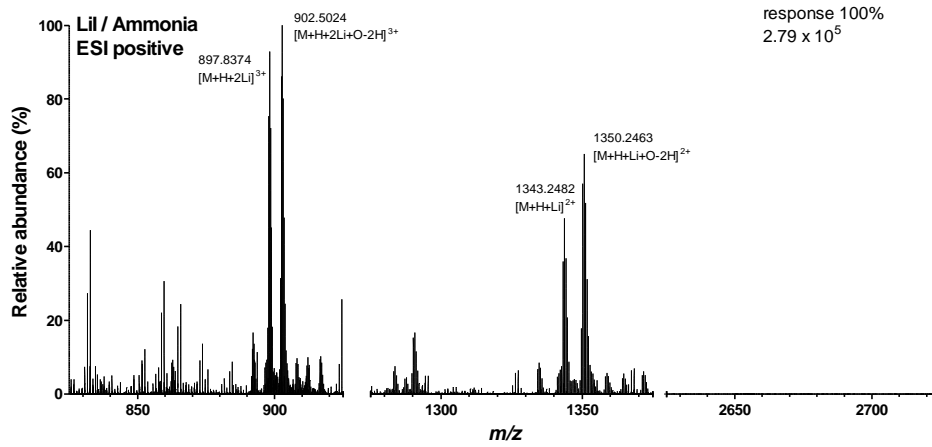

Figure S7. Spectrum PITX, ESI positive, mobile phase: Acetonitrile, H<sub>2</sub>O, LiI, ammonia.

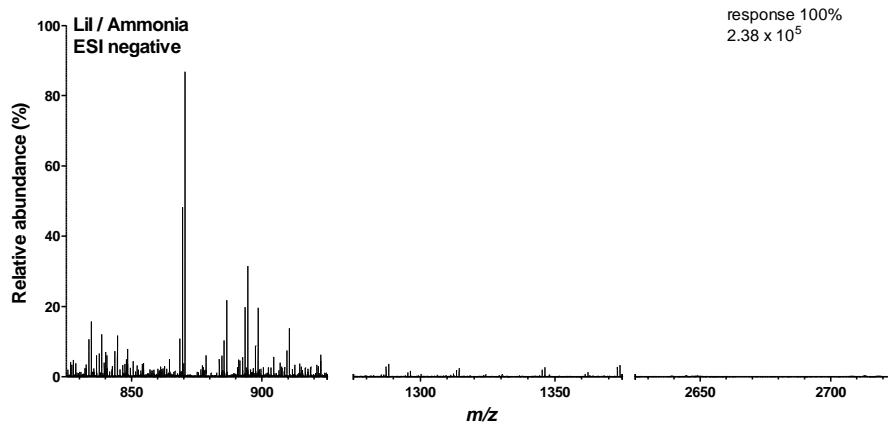

Figure S8. Spectrum PITX, ESI negative, mobile phase: Acetonitrile, H<sub>2</sub>O, LiI, ammonia.
